# Supplementary material
Source: Springer Nature journal article supplement (https://www.springermedizin.de/resource/supplementary/12883_2012_753_MOESM6_ESM.pdf/9456198)

III:1

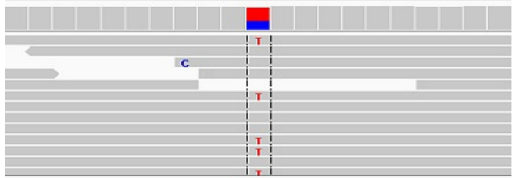

II:3

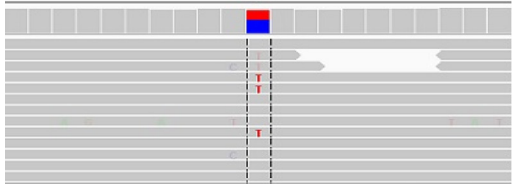

II:4

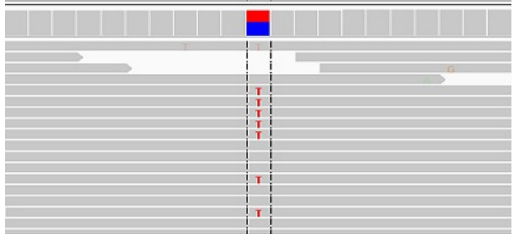

III:3

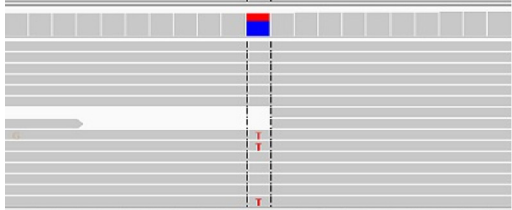

II:6

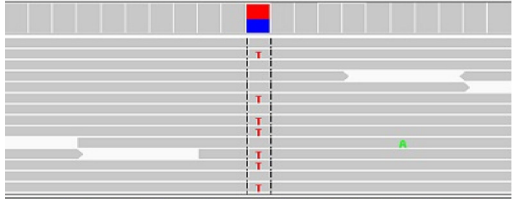

A A C A G G C A C A C C A G G G C C A T A

Supplement: MOESM6 [file 9456198]
